# Supplementary material for: The Genetic Basis of Baculum Size and Shape Variation in Mice
Source: PubMed Central journal article supplement (PMC4856068; doi:10.1534/g3.116.027888), 2016-03-01
Supplement: supp_g3.116.027888_FileS1.pdf [file supp_g3.116.027888_FileS1.pdf]

[https://figshare.com/articles/SuppFile1\\_tar\\_gz/3080725](https://figshare.com/articles/SuppFile1_tar_gz/3080725)

This tar.gz contains the scripts and .xyz point clouds from Schultz et al
