# Supplementary material for: The Genetic Basis of Baculum Size and Shape Variation in Mice
Source: PubMed Central journal article supplement (PMC4856068; doi:10.1534/g3.116.027888), 2016-03-01

## Size

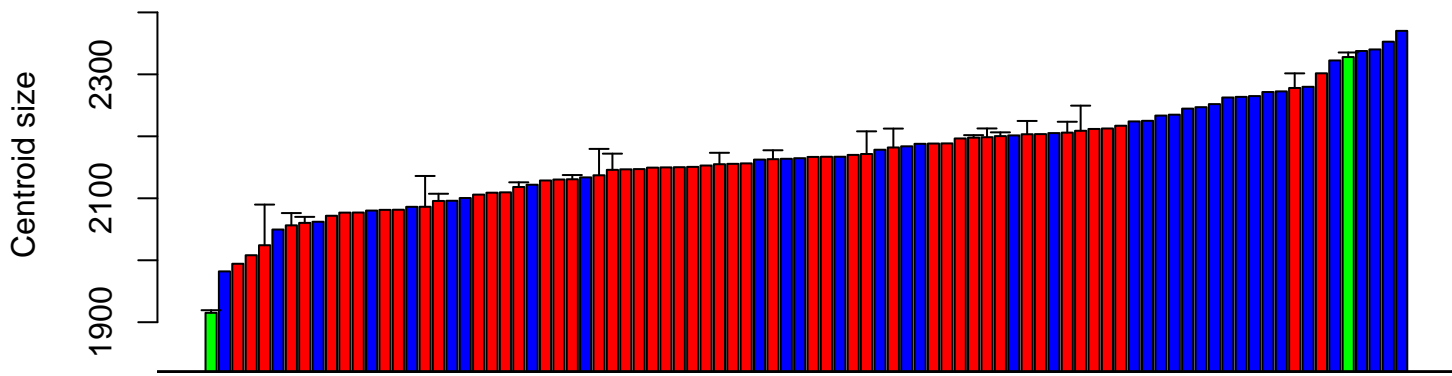

## Shape

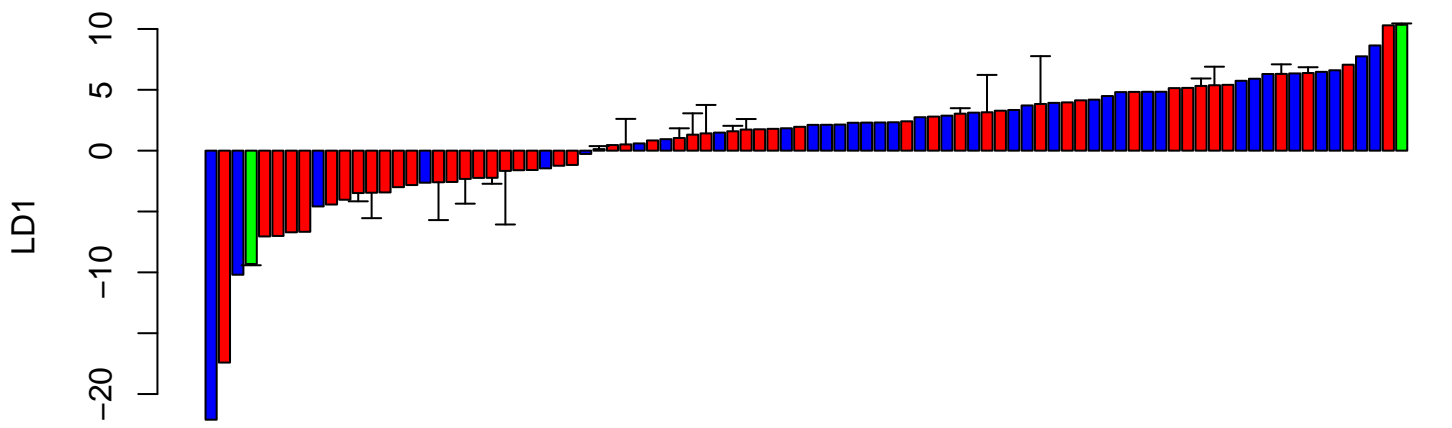

Supplement: supp_g3.116.027888_SuppFig1.pdf [file supp_g3.116.027888_SuppFig1.pdf]
